# Supplementary material for: Genetic variants specific to aging-related verbal memory: Insights from GWASs in a population-based cohort
Source: PubMed Central journal article supplement (PMC5553750; doi:10.1371/journal.pone.0182448), 2017-08-11
Supplement: pone.0182448.s006.pdf [file pone.0182448.s006.pdf]

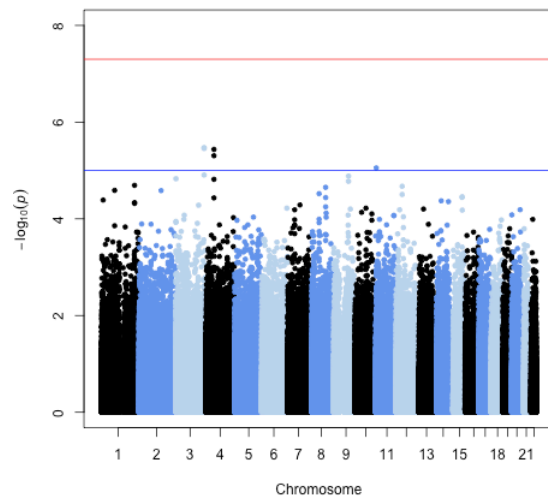

**A. IR-L**

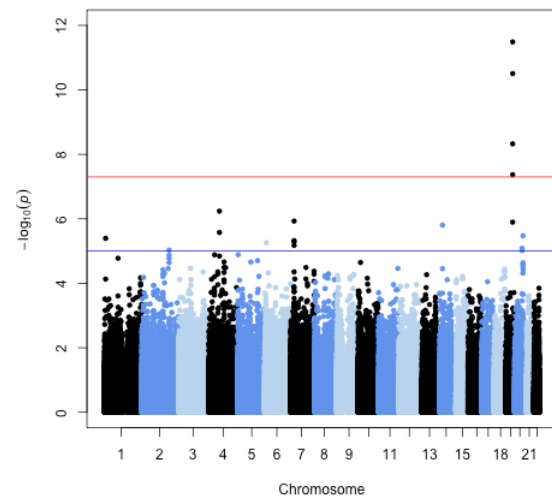

**C. rDR-L**

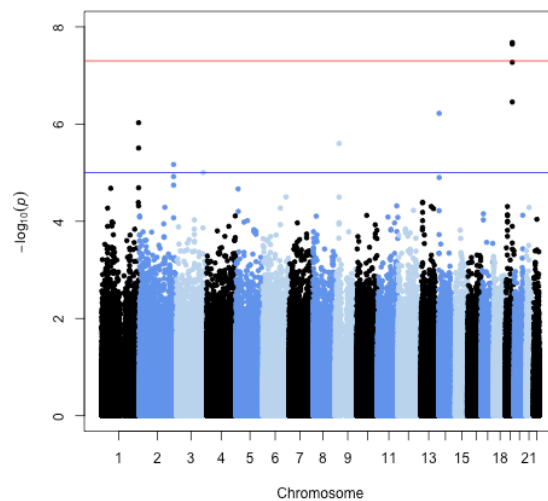

**B. IR-C**

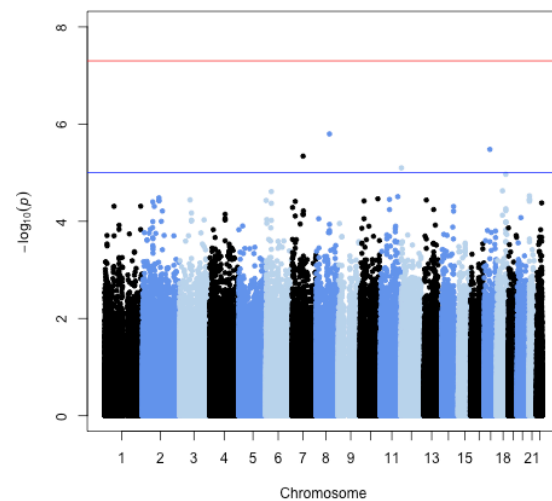

**D. rDR-C**

**Fig S6.** Plots show p-values for all SNP associations for the meta-analysis, for all phenotypes: (A) immediate recall level (IR-L) and (B) immediate recall change (IR-C) and (C) residual delayed recall level (rDR-L) and (D) residual delayed recall change (rDR-C). The upper (red) horizontal line demarcates the threshold of  $p = -\log(5.0 \times 10^{-8})$  and the lower (blue) horizontal line demarcates  $p = -\log(1 \times 10^{-5})$  for SNPs based on their chromosomal position (x-axis).
