# Supplementary material for: Genetic variants specific to aging-related verbal memory: Insights from GWASs in a population-based cohort
Source: PubMed Central journal article supplement (PMC5553750; doi:10.1371/journal.pone.0182448), 2017-08-11
Supplement: pone.0182448.s008.pdf [file pone.0182448.s008.pdf]

**Additional Analyses on Overlap of the Correlated Phenotype: DR-C**

To further examine the overlap between IR-C and DR-C, and DR-C and rDR-C, we conducted additional analyses. Change in DR scores were regressed on change in IR and rDR scores, adjusted for baseline age (age of first assessment after 60), years of follow-up in the study (M=8.47, SD=5.10), and sex. Change in IR and rDR scores accounted for 49% and 41% of the variation in change in DR scores after age 60, respectively. More detail is provided in the tables below.

**Table A.** Variation in DR decline accounted for by IR and rDR decline: Regressing DR on IR change scores, adjusted for age, years of follow-up, and sex

|                               | <b>B</b> | <b>SE</b> | <b>P</b>       |
|-------------------------------|----------|-----------|----------------|
| Age (baseline)                | -0.003   | 0.002     | 0.11           |
| Years of follow-up            | -0.014   | 0.002     | <.0001         |
| Sex (1=M)                     | -0.111   | 0.024     | <.0001         |
| Change in IR                  | 0.832    | 0.006     | <.0001         |
| <b>F-value</b>                |          |           | <b>5026.40</b> |
| <b>Adjusted R<sup>2</sup></b> |          |           | <b>0.49</b>    |

**Table B.** Variation in DR decline accounted for by IR and rDR decline: Regressing DR on rDR change scores, adjusted for age, years of follow-up, and sex

|                               | <b>B</b> | <b>SE</b> | <b>P</b>       |
|-------------------------------|----------|-----------|----------------|
| Age (baseline)                | -0.017   | 0.002     | <.0001         |
| Years of follow-up            | -0.053   | 0.003     | <.0001         |
| Sex (1=M)                     | -0.276   | 0.026     | <.0001         |
| Change in rDR                 | 0.873    | 0.007     | <.0001         |
| <b>F-value</b>                |          |           | <b>3656.92</b> |
| <b>Adjusted R<sup>2</sup></b> |          |           | <b>0.42</b>    |

### **Ad Hoc Analyses: GWASs on delayed recall level (DR-L) and delayed recall change (DR-C)**

Because immediate recall (IR) and delayed recall (DR) are phenotypically correlated, we created an independent phenotype of residualized-delayed recall (rDR). Thus, IR represents primarily the processes of acquisition and rehearsal whereas rDR represents primarily the processes of long term memory and retrieval. To provide context for interpreting the results for our four phenotypes (IR level (IR-L), IR change (IR-C), rDR level (rDR-L), and, rDR change (rDR-C)), we ran GWASs on DR level (DR-L) and DR-change (DR-C).

### **Results**

Table C provides the effect sizes and p-values for all six phenotypes for the top GWAS hits associated with IR-L, IR-C, rDR-L, and rDR-C. For the one SNP (chr 19, rs2075650) with genome-wide significance for its association with rDR-L ( $b=-0.043$ ,  $p=5 \times 10^{-08}$ ) the finding was specific to rDR-L and did replicate for the uncorrelated phenotype of IR-L ( $b=-0.032$ ,  $p=1 \times 10^{-01}$ ) but did for the correlated phenotype of DR-L ( $b=-0.104$ ,  $p=6 \times 10^{-05}$ ). Across many of the other listed SNPs, the effect sizes for the DR phenotypes are larger than for rDR, but there are also larger p-values.

### **Discussion**

DR-L and DR-C are complex phenotypes, requiring intact initial encoding and rehearsal as well as later retrieval. Disruption in any of these processes will interfere with DR performance. More phenotypic variation is seen for DR scores (Table 2 in article), but the genetic etiology may be more complex, reflected in the greater heterogeneity and larger p-values observed for DR than for rDR. Therefore, results of these ad hoc analyses support our approach of using rDR to isolate the aspects of delayed retrieval in DR that do not depend on IR.

**Table C.** Strongest associated SNPs from GWASs in the HRS sample, for immediate recall level (IR-L) and change (IR-C) and residual delayed recall level (rDR-L) and change (rDR-C), with comparison values for the correlated phenotypes of delayed recall level (DR-L) and delayed recall change (DR-C)

| Chr. | SNP             | Location  | Allele | IR-L   |         | DR-L   |         | rDR-L  |               | IR-C   |         | DR-C   |         | rDR-C  |         |
|------|-----------------|-----------|--------|--------|---------|--------|---------|--------|---------------|--------|---------|--------|---------|--------|---------|
|      |                 |           |        | Beta   | P-value | Beta   | P-value | Beta   | P-value       | Beta   | P-value | Beta   | P-value | Beta   | P-value |
| 1    | rs11804244      | 163212633 | G      |        |         |        |         |        |               | -0.029 | 4.E-06  | -0.021 | 3.E-03  | 0.001  | 3.E-01  |
| 1    | rs6704030       | 163218278 | G      |        |         |        |         |        |               | -0.029 | 5.E-06  | -0.021 | 3.E-03  | 0.001  | 3.E-01  |
| 2    | rs12463410      | 207715608 | A      |        |         |        |         |        |               | -0.054 | 2.E-06  | -0.044 | 5.E-04  | 0.001  | 5.E-01  |
| 6    | rs9504162       | 4599442   | A      | -0.013 | 4.E-01  | -0.063 | 1.E-03  | -0.028 | 4.E-06        |        |         |        |         |        |         |
| 6    | rs7766458       | 54140128  | C      | -0.095 | 5.E-06  | -0.111 | 1.E-05  | -0.017 | 3.E-02        |        |         |        |         |        |         |
| 6    | rs12195716      | 79535412  | G      |        |         |        |         |        |               | 0.005  | 3.E-01  | -0.012 | 5.E-02  | -0.005 | 4.E-06  |
| 6    | rs2174743       | 79591805  | A      |        |         |        |         |        |               | 0.005  | 4.E-01  | -0.012 | 5.E-02  | -0.005 | 4.E-06  |
| 6    | rs7756858       | 79619968  | G      |        |         |        |         |        |               | 0.005  | 4.E-01  | -0.012 | 5.E-02  | -0.005 | 2.E-06  |
| 6    | rs1572585       | 79690576  | A      |        |         |        |         |        |               | 0.005  | 4.E-01  | -0.012 | 4.E-02  | -0.005 | 3.E-06  |
| 6    | rs9372456       | 116592956 | G      |        |         |        |         |        |               | 0.028  | 1.E-06  | 0.013  | 4.E-02  | -0.001 | 3.E-01  |
| 6    | rs10581090      | 116658967 | A      |        |         |        |         |        |               | 0.026  | 4.E-06  | 0.011  | 7.E-02  | -0.001 | 3.E-01  |
| 6    | rs147391086     | 157984507 | A      | -0.153 | 1.E-06  | -0.134 | 5.E-04  | -0.010 | 9.E-01        |        |         |        |         |        |         |
| 6    | rs150510877     | 157994175 | A      | -0.159 | 6.E-07  | -0.139 | 3.E-04  | -0.001 | 9.E-01        |        |         |        |         |        |         |
| 12   | rs10880835      | 46079245  | C      |        |         |        |         |        |               | -0.001 | 9.E-01  | 0.012  | 6.E-02  | 0.005  | 3.E-06  |
| 12   | rs35162469      | 46081065  | A      |        |         |        |         |        |               | -0.001 | 9.E-01  | 0.011  | 7.E-02  | 0.005  | 3.E-06  |
| 13   | rs9510784       | 24188270  | A      | -0.027 | 7.E-02  | -0.072 | 7.E-05  | -0.025 | 4.E-06        |        |         |        |         |        |         |
| 15   | rs4076414       | 86441452  | C      | 0.009  | 5.E-01  | 0.051  | 4.E-03  | 0.025  | 4.E-06        |        |         |        |         |        |         |
| 17   | rs8072199       | 26116848  | A      | 0.074  | 5.E-07  | 0.067  | 2.E-04  | 0.019  | 7.E-01        |        |         |        |         |        |         |
| 19   | <b>rs283815</b> | 45390333  | G      | -0.006 | 7.E-01  | -0.067 | 3.E-03  | -0.031 | 4.E-06        | -0.032 | 2.E-06  | -0.022 | 4.E-03  | -0.002 | 2.E-01  |
| 19   | rs71352238      | 45394336  | G      | -0.035 | 1.E-01  | -0.106 | 4.E-05  | -0.043 | 7.E-08        | -0.025 | 2.E-03  | -0.016 | 8.E-02  | -0.002 | 2.E-01  |
| 19   | rs2075650       | 45395619  | G      | -0.032 | 1.E-01  | -0.104 | 6.E-05  | -0.043 | <b>5.E-08</b> | -0.029 | 3.E-04  | -0.019 | 3.E-02  | -0.002 | 2.E-01  |
| 19   | <b>rs157582</b> | 45396219  | A      | -0.011 | 5.E-01  | -0.074 | 8.E-04  | -0.033 | 1.E-06        | -0.032 | 2.E-06  | -0.021 | 5.E-03  | -0.002 | 2.E-01  |
| 19   | rs769449        | 45410002  | A      | -0.052 | 2.E-02  | -0.123 | 1.E-05  | -0.045 | 1.E-07        | -0.029 | 1.E-03  | -0.019 | 5.E-02  | 0.000  | 8.E-01  |
| 20   | rs11906369      | 46829233  | A      | -0.123 | 2.E-06  | -0.129 | 5.E-05  | -0.007 | 5.E-01        |        |         |        |         |        |         |
| 20   | rs6512614       | 48792663  | C      | -0.002 | 9.E-01  | -0.047 | 1.E-02  | -0.028 | 5.E-07        |        |         |        |         |        |         |
| 20   | rs6012871       | 48792992  | G      | -0.001 | 1.E+00  | -0.046 | 1.E-02  | -0.028 | 6.E-07        |        |         |        |         |        |         |
| 20   | rs6125931       | 48795413  | G      | -0.001 | 1.E+00  | -0.047 | 9.E-03  | -0.028 | 4.E-07        |        |         |        |         |        |         |
| 20   | rs6125934       | 48803937  | A      | 0.005  | 7.E-01  | -0.046 | 1.E-02  | -0.030 | 6.E-08        |        |         |        |         |        |         |
| 20   | rs6025261       | 55503259  | A      | 0.079  | 9.E-08  | 0.082  | 5.E-06  | 0.005  | 4.E-01        |        |         |        |         |        |         |

Notes.

Genome build GRCh37.

Blue (bold) SNP names indicates the SNPs are listed for suggested association with more than one phenotype at the  $p < 5E-06$  level in the HRS discovery cohort.

Orange (bold) effect sizes and p-values indicates the SNP association surpassed the genome-wide significance threshold of  $5E-08$  in the HRS discovery cohort.

Green shading indicates the association exceeds  $5E-06$  threshold in the HRS discovery cohort.

Pink shading indicates that the association with other phenotypes are provided for comparison.

Brown shading indicates that the results for the marker are for a correlated phenotype, with results provided for comparison.

**Table D.** Top hit SNPs from GWAS on rDR-L in the ELSA sample, that were not found in HRS

| Chr. | SNP        | Position | Ref. allele | Minor allele (freq.) | Gene(s) | ELSA   |        | HRS    |        |
|------|------------|----------|-------------|----------------------|---------|--------|--------|--------|--------|
|      |            |          |             |                      |         | Beta   | P      | Beta   | P      |
| 16   | rs4783859  | 54997905 | C           | C (0.43)             | --      | -0.034 | 4.E-06 | 0.031  | 6.E-01 |
| 16   | rs12931755 | 54998943 | C           | G (0.17)             | --      | -0.048 | 9.E-10 | 0.040  | 5.E-01 |
| 16   | rs4258610  | 55000195 | G           | T (0.17)             | --      | -0.058 | 1.E-10 | 0.036  | 6.E-01 |
| 16   | rs28413114 | 55002902 | T           | T (0.42)             | --      | -0.060 | 4.E-11 | 0.032  | 6.E-01 |
| 16   | rs34851234 | 55003947 | T           | T (0.14)             | --      | -0.047 | 3.E-09 | 0.056  | 3.E-01 |
| 16   | rs35826089 | 55012475 | T           | A (0.14)             | --      | -0.052 | 1.E-08 | -0.017 | 8.E-01 |
| 16   | rs34473486 | 55013607 | A           | T (0.14)             | --      | -0.057 | 3.E-10 | 0.032  | 6.E-01 |
| 16   | rs35755352 | 55017281 | T           | A (0.16)             | --      | -0.047 | 7.E-08 | 0.053  | 4.E-01 |
| 16   | rs4436774  | 55018268 | A           | A (0.15)             | --      | -0.045 | 1.E-07 | 0.062  | 3.E-01 |
| 16   | rs4784445  | 55020068 | A           | T (0.16)             | --      | -0.049 | 2.E-08 | 0.060  | 4.E-01 |
| 16   | rs4784446  | 55020841 | T           | A (0.16)             | --      | -0.045 | 1.E-07 | 0.066  | 3.E-01 |
| 16   | rs12448424 | 55020849 | A           | T (0.15)             | --      | -0.045 | 2.E-07 | 0.068  | 3.E-01 |
| 16   | rs12448424 | 55021482 | T           | T (0.15)             | --      | -0.045 | 1.E-07 | 0.066  | 3.E-01 |

Notes.

Genome build GRCh37.

-- indicates there was no known gene location, but all SNPs listed were flanked by *LOC100132339* to the left, and *IRX6* to the right
