# Supplementary material for: Genetic variants specific to aging-related verbal memory: Insights from GWASs in a population-based cohort
Source: PubMed Central journal article supplement (PMC5553750; doi:10.1371/journal.pone.0182448), 2017-08-11
Supplement: pone.0182448.s009.pdf [file pone.0182448.s009.pdf]

## Meta-Analysis Results

Tables below provide top SNPs associated with each phenotype at the suggestive level of a statistical significance,  $5 \times 10^{-6}$  for immediate recall level (IR-L; Table A), immediate recall change (IR-C; Table B), residual delayed recall level (rDR-L; Table C), and residual delayed recall change (rDR-C; Table D).

**Table A. Top SNP associations with IR-L from the meta-analysis of HRS and ELSA GWAS results**

| Chr | SNP Name   | Location  | Effect Allele | Weight | Zscore | P-value  | Direction |
|-----|------------|-----------|---------------|--------|--------|----------|-----------|
| 13  | rs1449587  | 49413468  | A             | 13930  | -4.863 | 1.16E-06 | --        |
| 3   | rs4122385  | 188140653 | A             | 14013  | -4.746 | 2.08E-06 | --        |
| 3   | rs2162259  | 188161706 | A             | 14017  | -4.73  | 2.25E-06 | --        |
| 8   | rs79129295 | 50225832  | A             | 13954  | 4.594  | 4.35E-06 | ++        |

**Table B. Top SNP associations with IR-C from the meta-analysis of HRS and ELSA GWAS results**

| Chr | SNP Name   | Location  | Effect Allele | Weight | Zscore | P-value  | Direction |
|-----|------------|-----------|---------------|--------|--------|----------|-----------|
| 19  | rs157582   | 45396219  | A             | 13163  | -6.139 | 8.29E-10 | --        |
| 19  | rs283815   | 45390333  | G             | 13032  | -6.008 | 1.88E-09 | --        |
| 19  | rs769449   | 45410002  | A             | 13179  | -5.593 | 2.24E-08 | --        |
| 19  | rs2075650  | 45395619  | G             | 13198  | -5.324 | 1.01E-07 | --        |
| 17  | rs8073765  | 13629731  | G             | 13195  | -4.88  | 1.06E-06 | --        |
| 19  | rs71352238 | 45394336  | G             | 13169  | -4.859 | 1.18E-06 | --        |
| 8   | rs73526541 | 1074467   | A             | 13207  | -4.66  | 3.16E-06 | --        |
| 6   | rs760608   | 114719447 | G             | 13196  | -4.632 | 3.63E-06 | --        |

**Table C. Top SNP associations with rDR-L from the meta-analysis of HRS and ELSA GWAS results**

| Chr | SNP Name   | Location | Effect Allele | Weight | Zscore | P-value  | Direction |
|-----|------------|----------|---------------|--------|--------|----------|-----------|
| 19  | rs769449   | 45410002 | A             | 13992  | -6.975 | 3.05E-12 | --        |
| 19  | rs2075650  | 45395619 | G             | 14011  | -6.57  | 5.03E-11 | --        |
| 19  | rs71352238 | 45394336 | G             | 13981  | -6.46  | 1.04E-10 | --        |
| 19  | rs157582   | 45396219 | A             | 13972  | -5.791 | 7.01E-09 | --        |
| 19  | rs283815   | 45390333 | G             | 13842  | -5.403 | 6.55E-08 | --        |
| 4   | rs705119   | 72613036 | A             | 14006  | 4.921  | 8.60E-07 | ++        |
| 1   | rs6571943  | 9132520  | A             | 14013  | 4.865  | 1.14E-06 | ++        |
| 7   | rs16873450 | 23806640 | A             | 14013  | 4.857  | 1.19E-06 | ++        |
| 4   | rs705120   | 72614140 | A             | 14005  | 4.856  | 1.20E-06 | ++        |
| 14  | rs1950326  | 40039316 | T             | 14007  | 4.801  | 1.58E-06 | ++        |
| 4   | rs7041     | 72618334 | A             | 14012  | 4.759  | 1.95E-06 | ++        |
| 14  | rs4902774  | 40032181 | G             | 13974  | 4.723  | 2.33E-06 | ++        |
| 19  | rs34095326 | 45395844 | A             | 13993  | -4.685 | 2.80E-06 | --        |
| 7   | rs13240694 | 23564901 | A             | 13926  | 4.682  | 2.84E-06 | ++        |
| 6   | rs9380152  | 11234035 | A             | 14012  | 4.676  | 2.93E-06 | ++        |
| 7   | rs7792388  | 23541266 | A             | 14019  | 4.675  | 2.94E-06 | ++        |
| 7   | rs4722238  | 23568653 | G             | 14012  | 4.662  | 3.13E-06 | ++        |
| 1   | rs12117043 | 9132520  | A             | 13999  | 4.624  | 3.76E-06 | ++        |
| 1   | rs875995   | 9098272  | A             | 13938  | 4.618  | 3.88E-06 | ++        |
| 20  | rs6123551  | 54762418 | G             | 14001  | 4.609  | 4.04E-06 | ++        |
| 4   | rs222040   | 72616932 | G             | 14012  | 4.607  | 4.09E-06 | ++        |
| 4   | rs222047   | 72610208 | A             | 13992  | 4.601  | 4.21E-06 | ++        |

**Table D. Top SNP associations with rDR-C from the meta-analysis of HRS and ELSA GWAS results**

| Chr | SNP Name   | Location | Effect Allele | Weight | Zscore | P-value  | Direction |
|-----|------------|----------|---------------|--------|--------|----------|-----------|
| 8   | rs2974279  | 88075043 | A             | 13066  | -4.74  | 2.14E-06 | --        |
| 17  | rs72823319 | 37280517 | A             | 13156  | -4.634 | 3.59E-06 | --        |
| 17  | rs7225562  | 37267827 | G             | 12995  | -4.625 | 3.74E-06 | --        |
| 7   | rs10949834 | 73480569 | A             | 13076  | -4.62  | 3.84E-06 | --        |
| 8   | rs4596672  | 88055465 | G             | 13147  | -4.587 | 4.50E-06 | --        |
